# Supplementary material
Source: publisher figshare collection journal article supplement (https://acs.figshare.com/ndownloader/files/3992071)
Supplement: Supplementary file 1 [file 3992071]

## Supplementary Information

# Hierarchical porosity in silica thin films by a one-step templating strategy using a stimuli-responsive bioderived glycolipid

### Authors

Niki Baccile, Thomas Fontecave, Cédric Boissière, Inge N. A. Van Bogaert

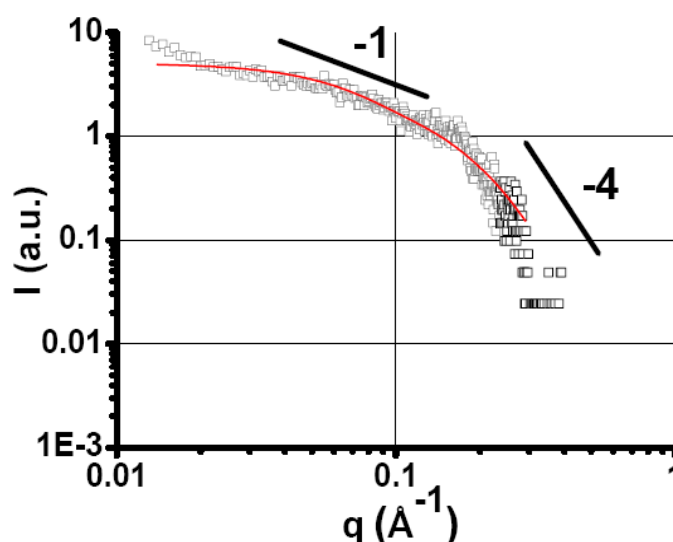

Figure S1 – Log-log plot of the SAXS spectrum recorded for sample S7 fitted using a cylinder form factor. Fit has been done using the “Scatter” software package<sup>1</sup>

<sup>1</sup> a/ S. Förster, C. Burger, *Macromolecules*, 1998, 31, 879; b/ S. Förster, A. Timmann, M. Konrad, C. Schellbach, A. Meyer, S.S. Funari, P. Mulvaney, R. Knott, *J. Phys. Chem. B*, 2005, 109, 1347. The software is available at the website: [http://www.pci.uni-bayreuth.de/rg\\_foerster/en/Software/index.html](http://www.pci.uni-bayreuth.de/rg_foerster/en/Software/index.html)

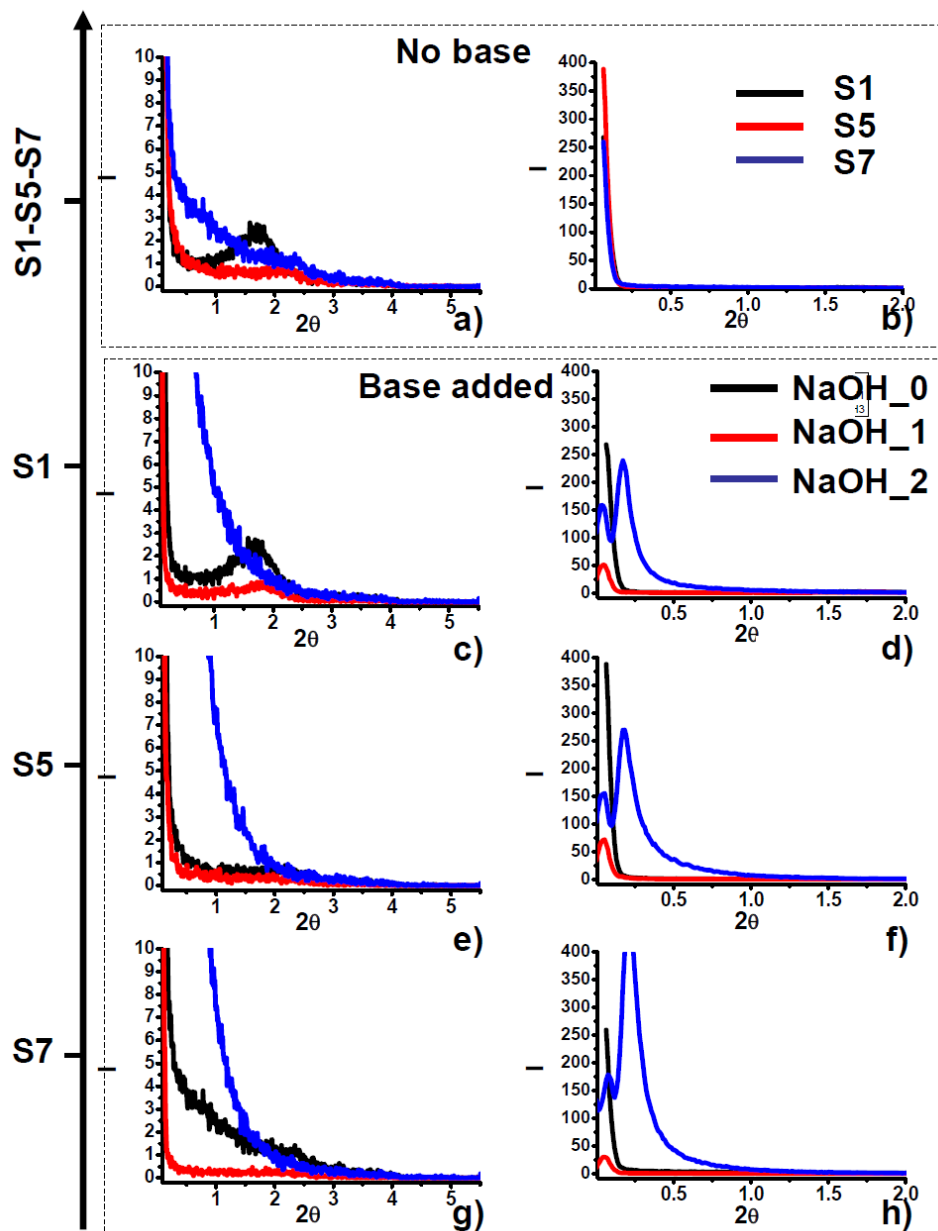

Figure S2 – Integrated SAXS patterns corresponding to samples S1, S5 and S7. For the meaning of NaOH\_0, NaOH\_1 and NaOH\_2 refer to Table 2 in the main manuscript. Spectra on the left and right column are the same but scaled differently both in X and Y directions in order to highlight the mesostructure at different scales.

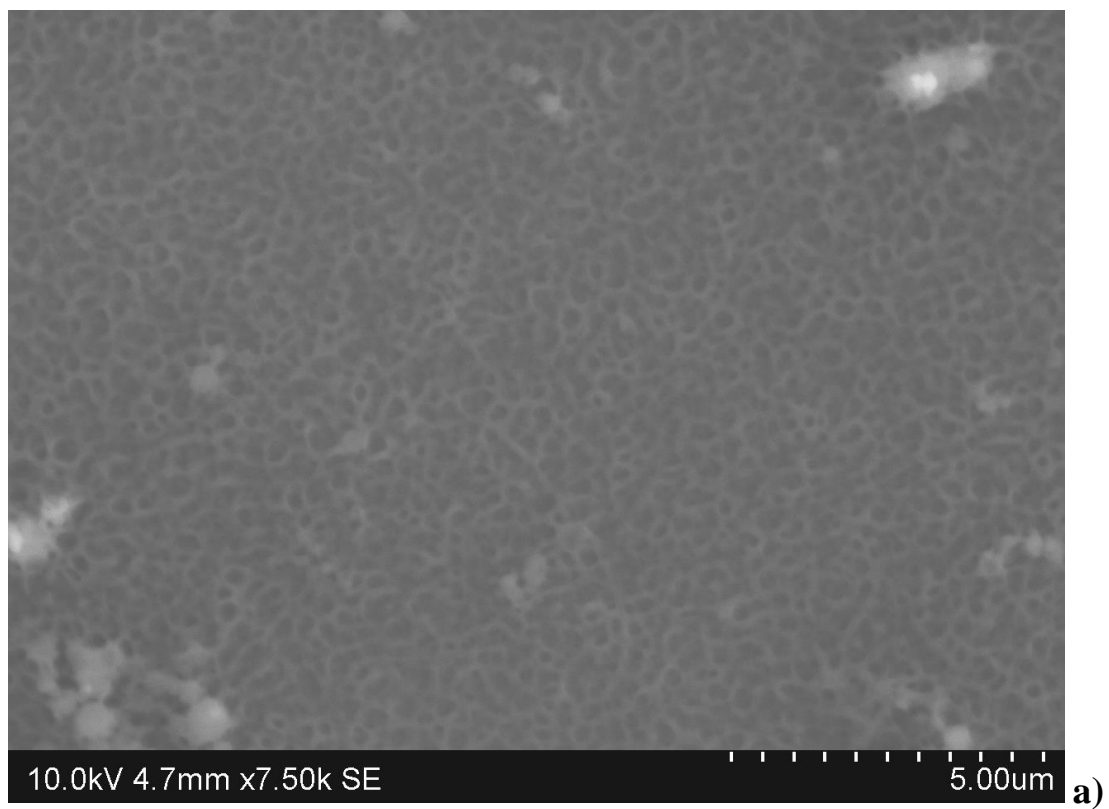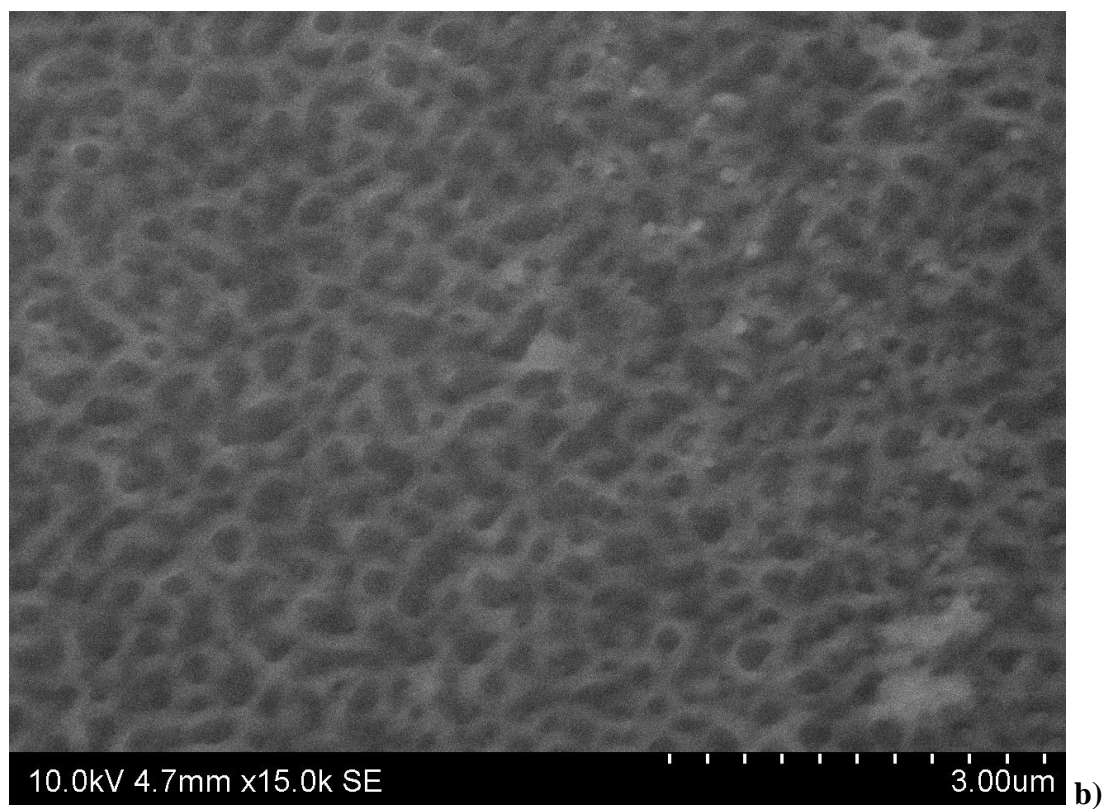

Figure S3

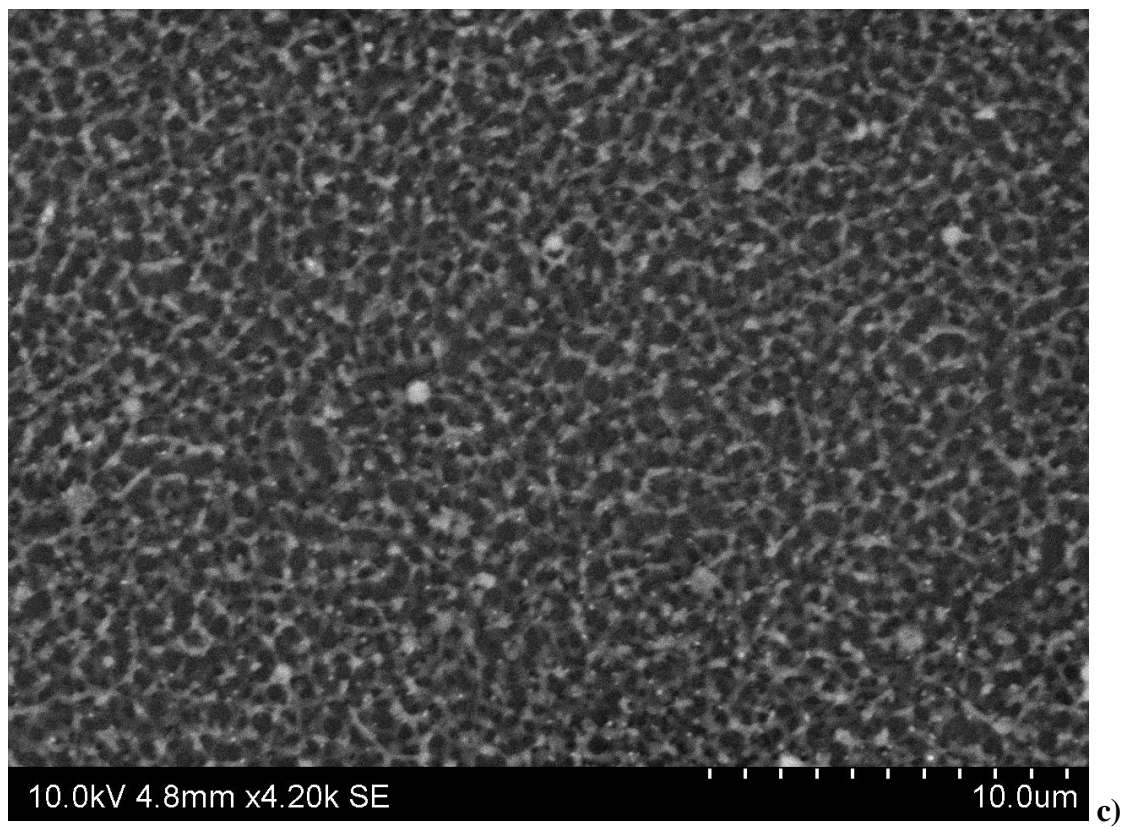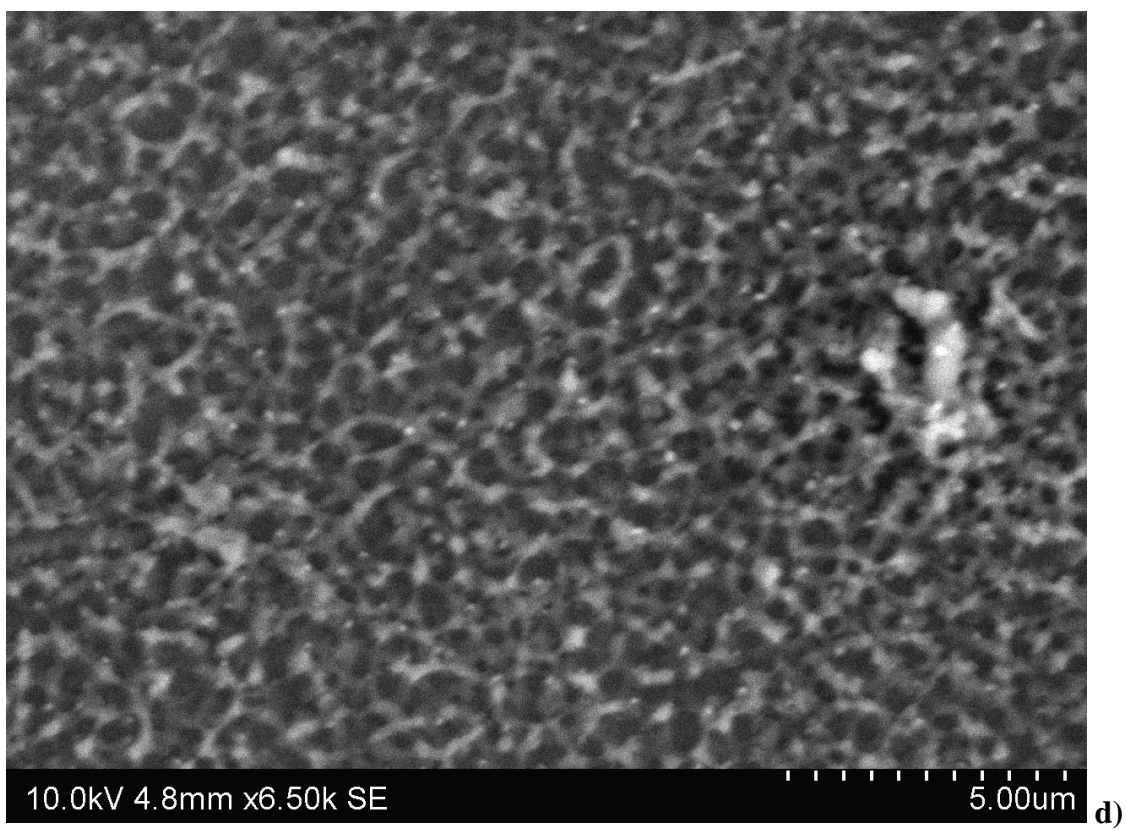

Figure S3 (continued)

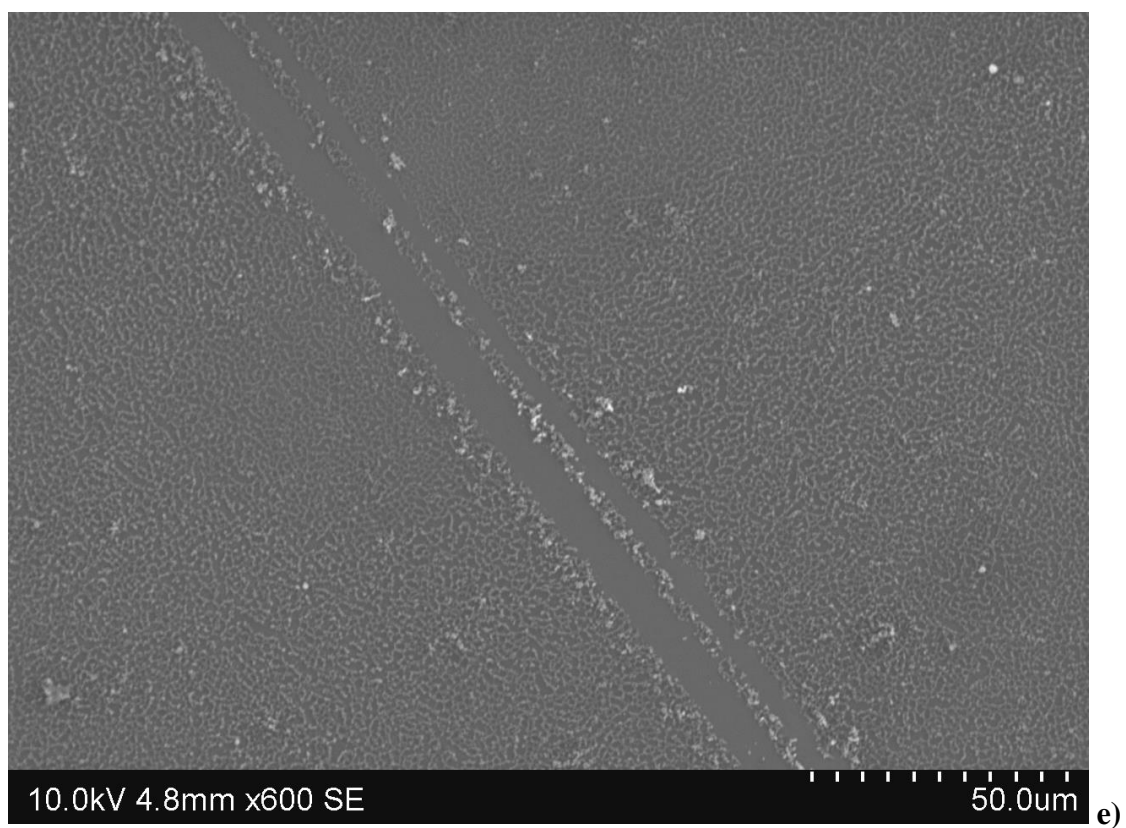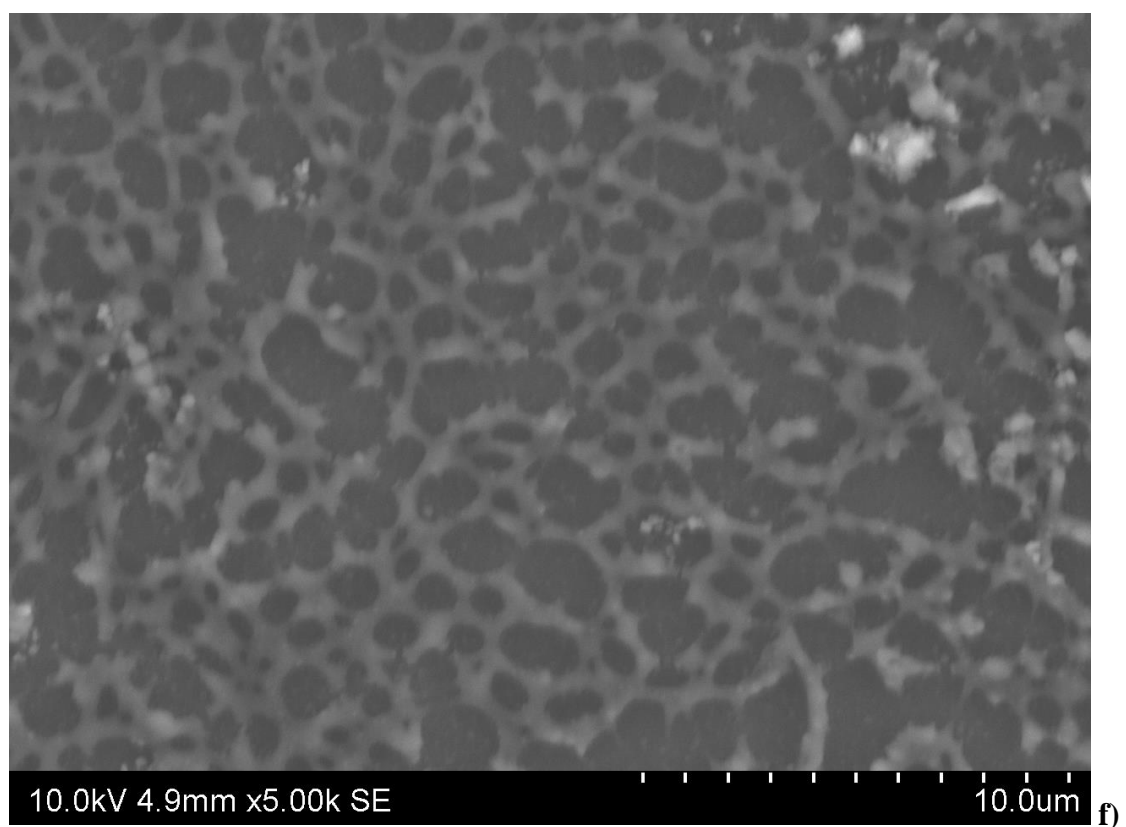

**Figure S3 – SEM images of sample (a, b) S1, (c, d) S5 and (e, f) S7 in the NaOH\_2 conditions (largest amount of base. See main text for details)**

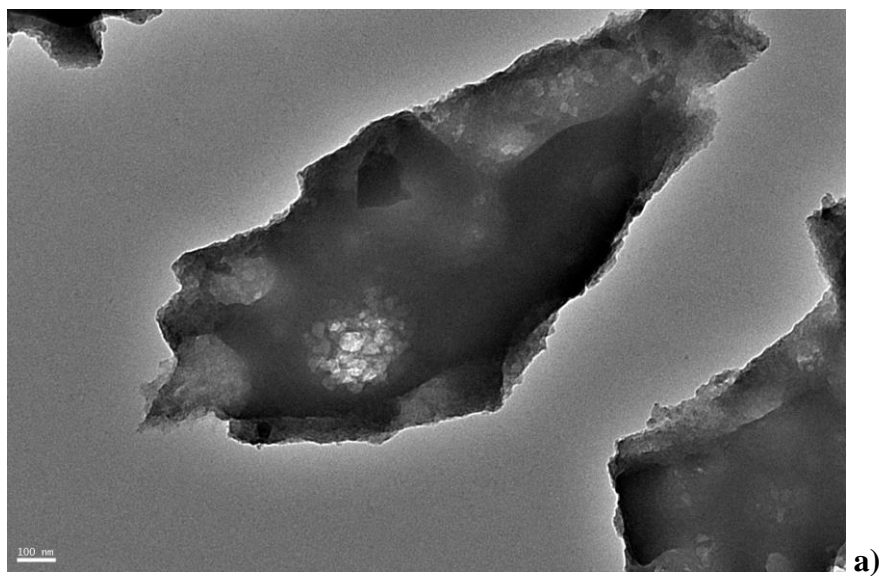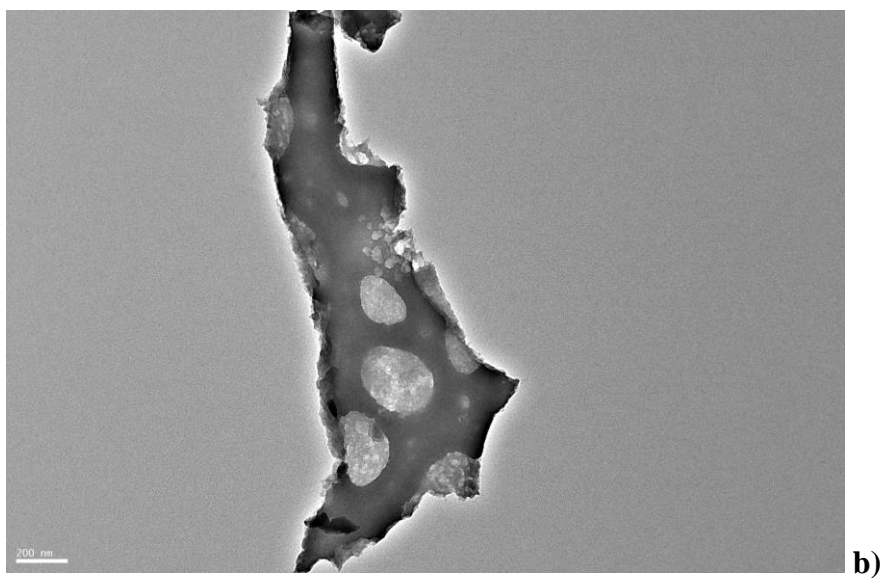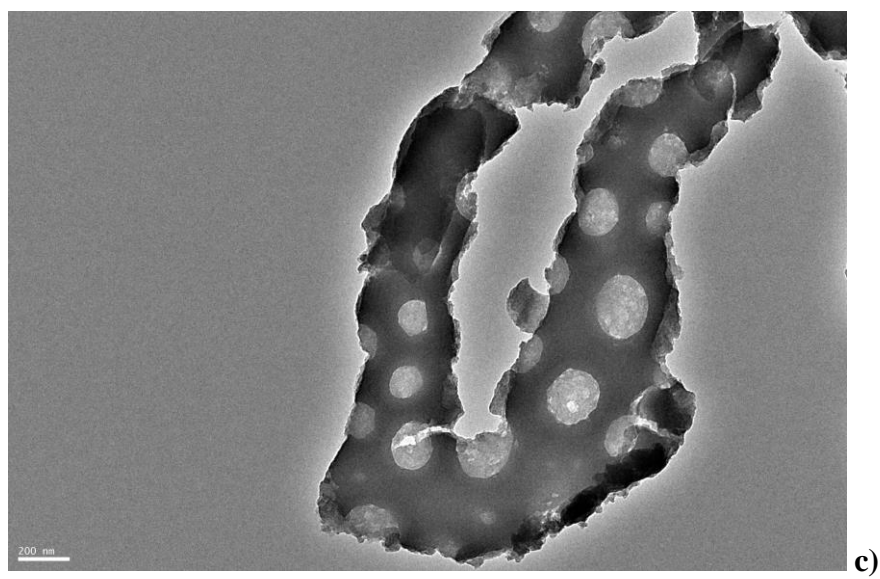

**Figure S4**



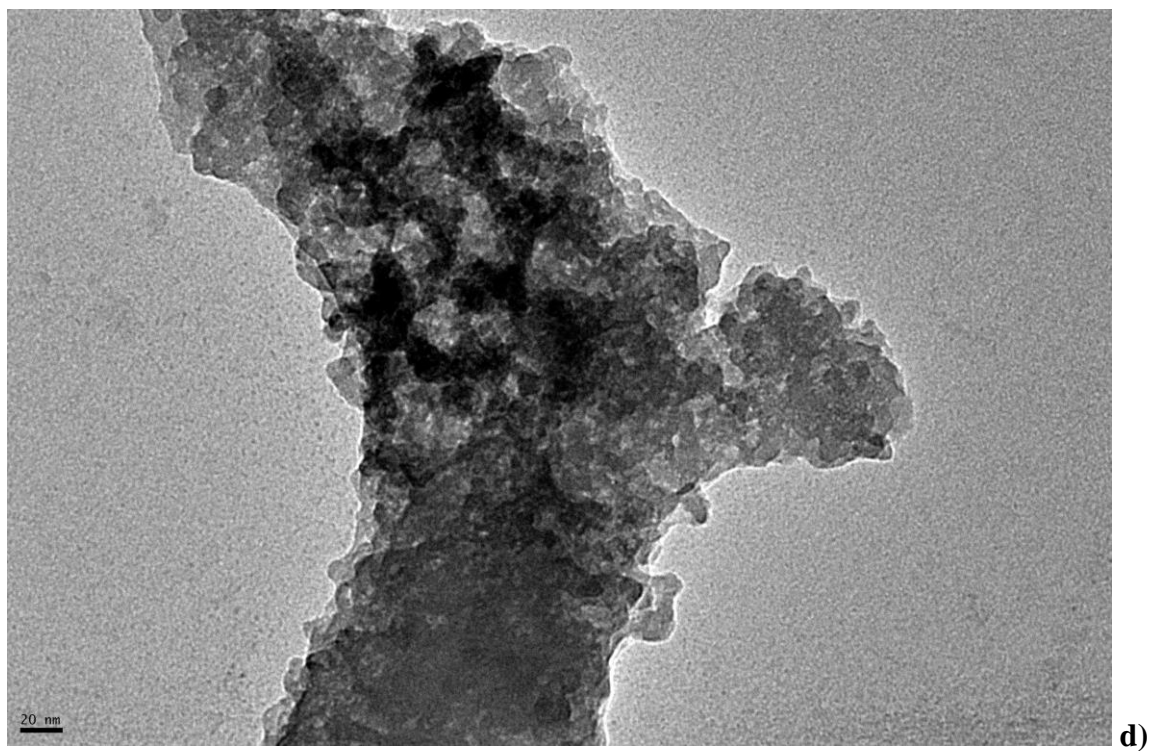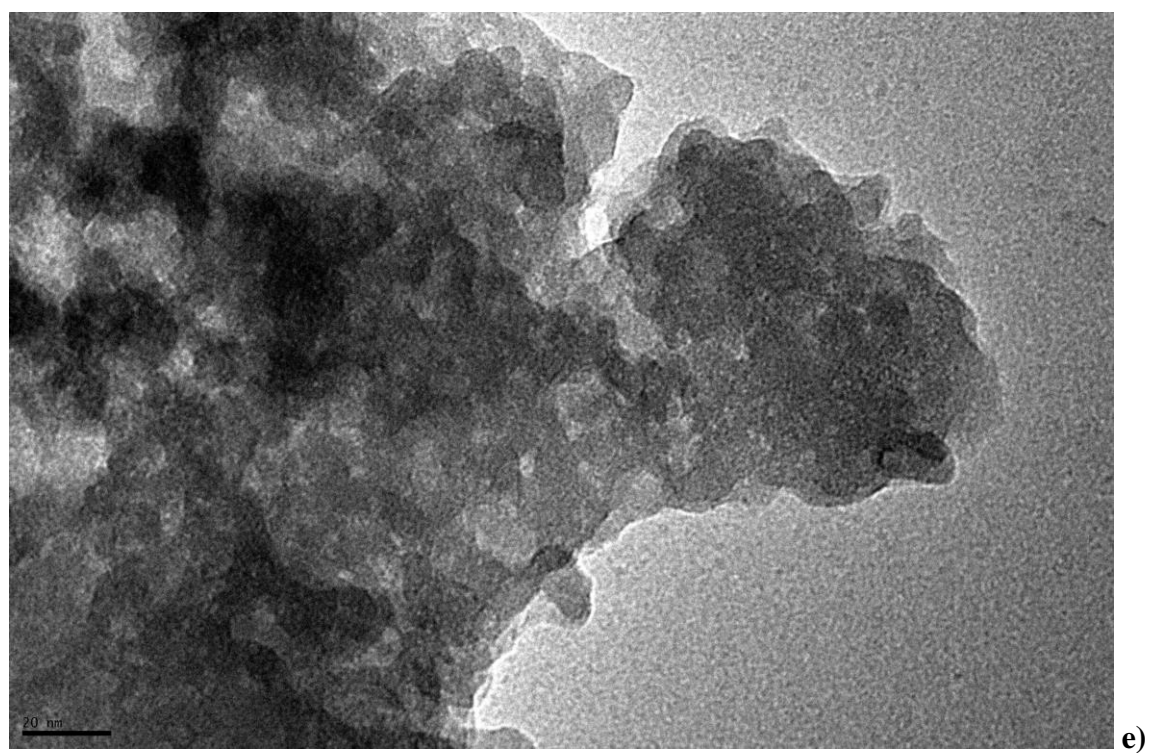

**Figure S4 - TEM images of sample (a, b) S1 and (c, d) S5 in the NaOH<sub>2</sub> conditions (largest amount of base. See main text for details)**

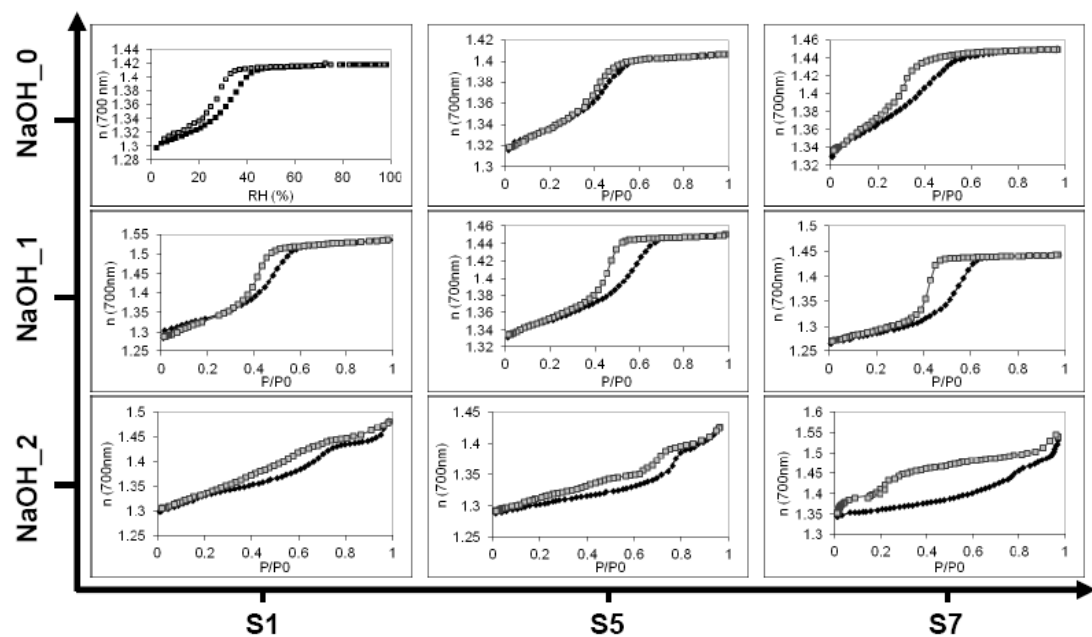

a)

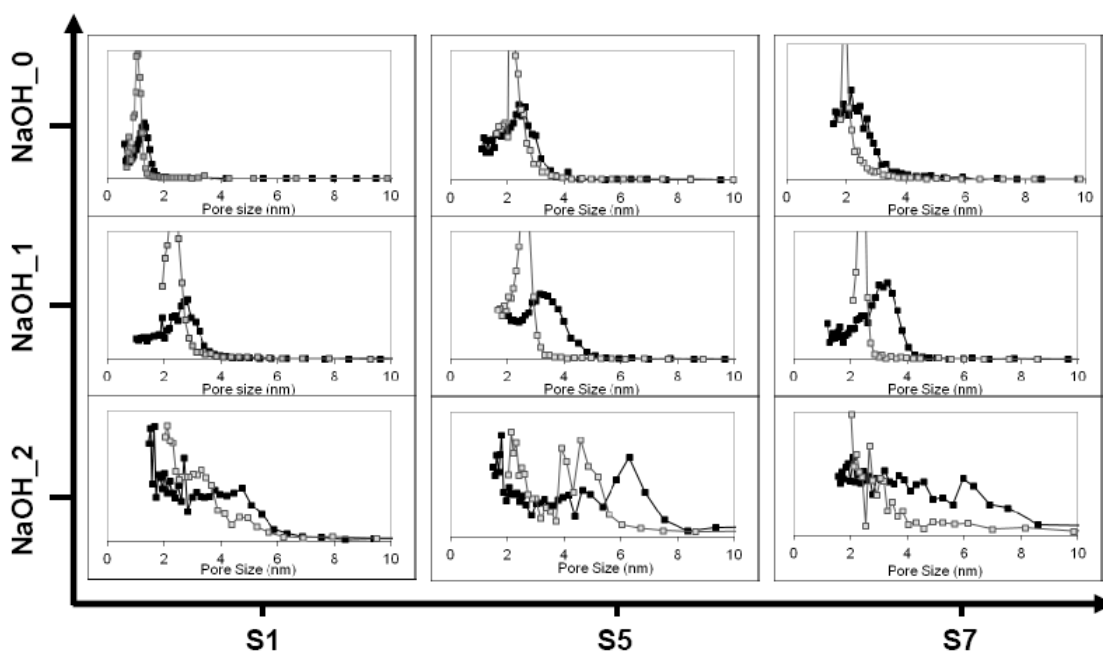

b)

**Figure S5 – (a) Water adsorption-desorption isotherms measured using ellipsoporosimetry for samples S1, S5, S7 in the NaOH\_0 (base-free), NaOH\_1 and NaOH\_2 conditions. (b) Pore size distribution derived from the isotherms for the same set of samples.**



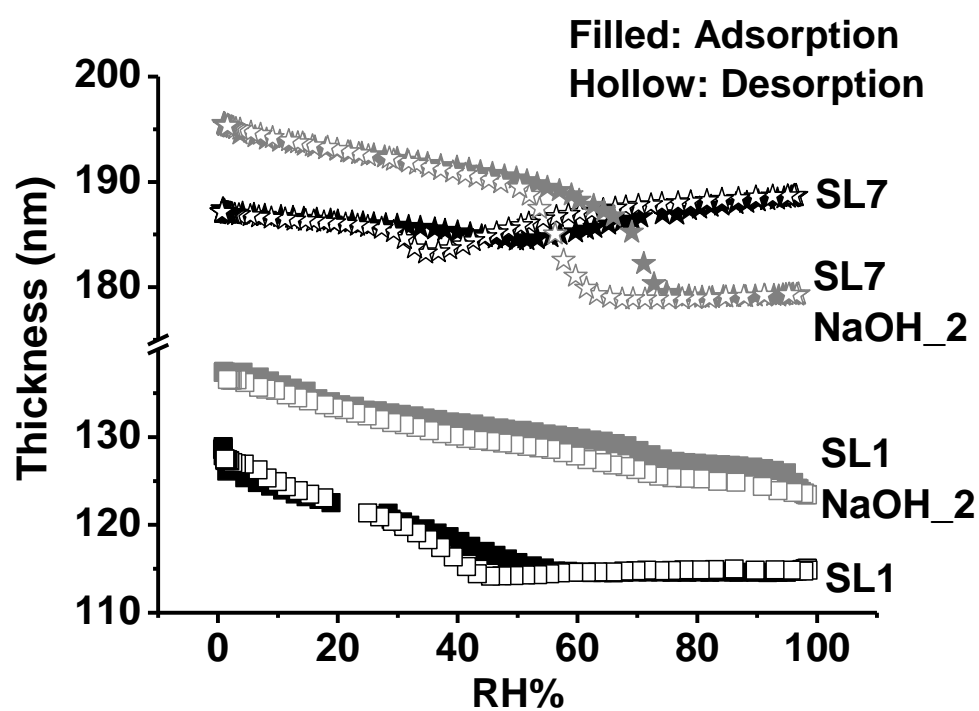

Figure S6 – Evolution of the silica film thickness with relative humidity RH% for selected samples. Filled and hollow symbols indicate, respectively, water adsorption and desorption

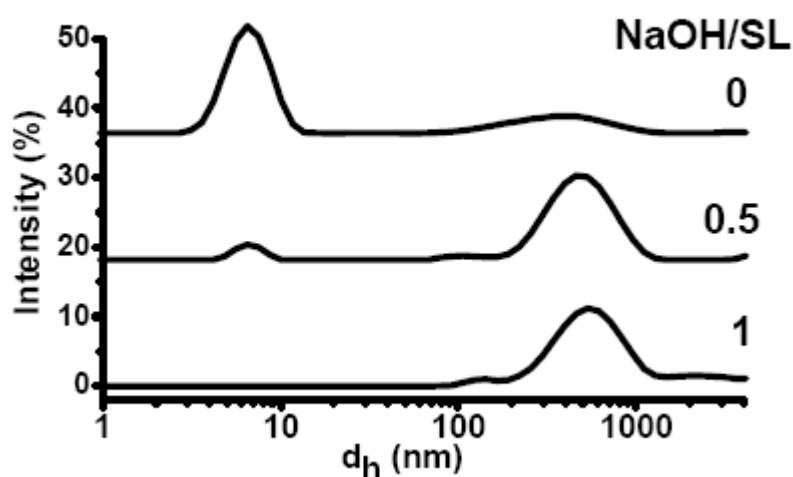

**Figure S7 – Intensity-processed Dynamic Light Scattering data recorded on water solutions of acidic sophorolipids at increasing NaOH/SL molar ratio for a 5 mg/mL solution**

Figure S6 shows DLS analysis of water-based silica-free solution at various NaOH/SL molar ratio: 0, 0.5 and 1. Typical Intensity-filtered size distributions show the evolution of the hydrodynamic diameter ( $d_h$ ) as a function of NaOH/SL

When no base is added (NaOH/SL= 0) the pH is generally slightly acidic ( $\text{pH} < 5.5$ ) and the solution is mainly composed of micellar objects where  $d_h < 10$  nm. At NaOH/SL= 0.5 and 1, signals intensities are inversed: small micelles (signal at  $d_h < 10$  nm) disappear in favor of polydisperse, large ( $d_h > 100$  nm) aggregates. At NaOH/SL= 1, the system is exclusively composed of large assemblies, as suggested by the missing signal at  $d_h < 10$  nm and the intense polydisperse signals at  $d_h > 100$ .
